# Supplementary material for: How palliative care professionals develop coping competence through their career: A grounded theory
Source: PubMed Central journal article supplement — Palliat Med. 2024 Feb 21;38(3):284–96. doi: 10.1177/02692163241229961 (PMC10955801; doi:10.1177/02692163241229961), 2024-02-21
Supplement: sj-pdf-1-pmj-10.1177_02692163241229961.pdf [file sj-pdf-1-pmj-10.1177_02692163241229961.pdf]

## **Appendix 1: Semi-structured interview guide**

### **Socio-demographic data:**

Age:

Children:

Profession:

Years worked in profession:

Years worked in PC:

Postgraduate training in PC:

Religion/Beliefs/Religious practice:

The interview would start like this, and these are the possible guide questions:

I would like you to tell me about a case in your work that has had an emotional impact on you, that has marked you in some way (silence).

How did you experience it? What did you feel?

What did you do afterwards?

Did you manage to help the other person, in what way, how did you perceive it?

Has what you have done helped you? in what way? Describe it...

Have you always handled it this way?

Looking a little further back, since you started working in CP, over those years would you say that it has changed your way of dealing with it? Do you want to describe it?

Do you have any strategies within the team?

Have you ever thought that you just couldn't do it anymore?

Is there anything you would like to mention?

Thank you very much
